# Supplementary material for: Virome Diversity among Mosquito Populations in a Sub-Urban Region of Marseille, France
Source: MDPI journal article supplement (doi:10.3390/v13050768), 2021-04-27
Supplement: s1 [file s1]

**Supplementary file 2.** Details on the composition of pools for virome preparation.

| <i>Pool A</i>           |                 |                         |                    |
|-------------------------|-----------------|-------------------------|--------------------|
| <i>Aedes albopictus</i> |                 |                         |                    |
|                         | Collection week | <i>Specimens Number</i> | Date of collection |
| <b>Site 1</b>           | 23              | 1                       | 06/06/2016         |
|                         | 24              | 1                       | 06/13/2016         |
|                         | 25              | 1                       | 06/20/2016         |
|                         | 26              | 1                       | 06/28/2016         |
|                         | 29              | 1                       | 07/18/2016         |
|                         | 30              | 1                       | 07/25/2016         |
|                         | 31              | 1                       | 08/01/2016         |
|                         | 32              | 1                       | 08/08/2016         |
|                         | 33              | 1                       | 08/15/2016         |
|                         | 34              | 2                       | 08/22/2016         |
|                         | 35              | 2                       | 08/28/2016         |
|                         | 36              | 1                       | 09/05/2016         |
|                         | 37              | 1                       | 09/12/2016         |
|                         | 38              | 1                       | 09/19/2016         |
|                         | 39              | 1                       | 09/26/2016         |
|                         | 40              | 1                       | 10/03/2016         |
|                         | 41              | 1                       | 10/17/2016         |
|                         | 42              | 1                       | 11/02/2016         |
| <b>Total</b>            |                 | 20                      |                    |
| <b>Site 2</b>           | 23              | 1                       | 06/06/2016         |
|                         | 24              | 1                       | 06/13/2016         |
|                         | 26              | 1                       | 06/28/2016         |
|                         | 27              | 1                       | 07/04/2016         |
|                         | 29              | 1                       | 07/18/2016         |

|               |    |    |            |
|---------------|----|----|------------|
|               | 30 | 1  | 07/25/2016 |
|               | 31 | 2  | 08/01/2016 |
|               | 32 | 2  | 08/08/2016 |
|               | 33 | 2  | 08/15/2016 |
|               | 34 | 1  | 08/22/2016 |
|               | 35 | 1  | 08/28/2016 |
|               | 36 | 2  | 09/05/2016 |
|               | 37 | 1  | 09/12/2016 |
|               | 38 | 1  | 09/19/2016 |
|               | 40 | 1  | 10/03/2016 |
|               | 41 | 1  | 10/17/2016 |
| <b>Total</b>  |    | 20 |            |
| <hr/>         |    |    |            |
|               | 24 | 1  | 06/13/2016 |
|               | 25 | 1  | 06/20/2016 |
|               | 26 | 1  | 06/28/2016 |
|               | 27 | 1  | 07/04/2016 |
|               | 30 | 1  | 07/25/2016 |
|               | 31 | 1  | 08/01/2016 |
|               | 32 | 2  | 08/08/2016 |
| <b>Site 3</b> | 33 | 2  | 08/15/2016 |
|               | 34 | 1  | 08/22/2016 |
|               | 35 | 2  | 08/28/2016 |
|               | 36 | 1  | 09/05/2016 |
|               | 37 | 1  | 09/12/2016 |
|               | 38 | 1  | 09/19/2016 |
|               | 39 | 1  | 09/26/2016 |
|               | 40 | 1  | 10/02/2016 |

|               |    |    |            |
|---------------|----|----|------------|
|               | 41 | 1  | 10/17/2016 |
|               | 43 | 1  | 11/02/2016 |
| <b>Total</b>  |    | 20 |            |
| <hr/>         |    |    |            |
|               | 24 | 1  | 06/13/2016 |
|               | 26 | 1  | 06/28/2016 |
|               | 27 | 1  | 07/04/2016 |
|               | 28 | 1  | 07/11/2016 |
|               | 29 | 1  | 07/18/2016 |
|               | 31 | 1  | 08/01/2016 |
|               | 33 | 2  | 08/15/2016 |
| <b>Site 4</b> | 34 | 1  | 08/22/2016 |
|               | 35 | 3  | 08/28/2016 |
|               | 36 | 2  | 09/05/2016 |
|               | 37 | 1  | 09/12/2016 |
|               | 38 | 1  | 09/19/2016 |
|               | 39 | 1  | 09/26/2016 |
|               | 40 | 2  | 10/02/2016 |
|               | 41 | 1  | 10/17/2016 |
| <b>Total</b>  |    | 20 |            |
| <hr/>         |    |    |            |
|               | 26 | 1  | 06/28/2016 |
|               | 28 | 1  | 07/11/2016 |
|               | 30 | 1  | 07/25/2016 |
|               | 32 | 1  | 08/08/2016 |
|               | 34 | 1  | 08/22/2016 |
|               | 38 | 1  | 09/19/2016 |
|               | 40 | 1  | 10/03/2016 |
|               | 42 | 1  | 10/17/2016 |

|                           |                        |                                |                           |
|---------------------------|------------------------|--------------------------------|---------------------------|
| <b>Total</b>              |                        | 8                              |                           |
| <b>Site 6</b>             | 29                     | 1                              | 07/18/2016                |
|                           | 31                     | 1                              | 08/01/2016                |
|                           | 33                     | 1                              | 08/15/2016                |
|                           | 35                     | 2                              | 08/29/2016                |
|                           | 36                     | 2                              | 09/05/2016                |
|                           | 37                     | 2                              | 09/12/2016                |
|                           | 39                     | 1                              | 09/26/2016                |
|                           | 41                     | 1                              | 10/10/2016                |
|                           | 43                     | 1                              | 11/02/2016                |
| <b>Total</b>              |                        | 12                             |                           |
| <b><i>Pool B</i></b>      |                        |                                |                           |
| <b><i>Cx. pipiens</i></b> |                        |                                |                           |
|                           | <b>Collection week</b> | <b><i>Specimens Number</i></b> | <b>Date of collection</b> |
| <b>Site 1</b>             | 28                     | 1                              | 07/11/2016                |
|                           | 29                     | 1                              | 07/18/2016                |
|                           | 30                     | 1                              | 07/25/2016                |
|                           | 31                     | 1                              | 08/01/2016                |
|                           | 32                     | 2                              | 08/08/2016                |
|                           | 33                     | 1                              | 08/15/2016                |
|                           | 35                     | 1                              | 08/28/2016                |
| <b>Total</b>              |                        | 8                              |                           |
| <b>Site 2</b>             | 23                     | 2                              | 06/06/2016                |
|                           | 24                     | 1                              | 06/13/2016                |
|                           | 26                     | 2                              | 06/28/2016                |
|                           | 27                     | 3                              | 07/04/2016                |
|                           | 28                     | 2                              | 07/11/2016                |
|                           | 30                     | 1                              | 07/25/2016                |

|               |    |    |            |
|---------------|----|----|------------|
|               | 33 | 2  | 08/15/2016 |
|               | 35 | 2  | 08/28/2016 |
|               | 38 | 1  | 09/19/2016 |
|               | 39 | 1  | 09/26/2016 |
|               | 41 | 1  | 10/17/2016 |
| <b>Total</b>  |    | 18 |            |
| <hr/>         |    |    |            |
|               | 23 | 2  | 06/06/2016 |
|               | 24 | 2  | 06/13/2016 |
|               | 25 | 2  | 06/20/2016 |
|               | 27 | 1  | 07/04/2016 |
|               | 32 | 1  | 08/08/2016 |
| <b>Site 3</b> | 33 | 3  | 08/15/2016 |
|               | 34 | 2  | 08/22/2016 |
|               | 35 | 4  | 08/28/2016 |
|               | 40 | 1  | 10/02/2016 |
| <b>Total</b>  |    | 18 |            |
| <hr/>         |    |    |            |
|               | 23 | 1  | 06/06/2016 |
|               | 24 | 2  | 06/13/2016 |
|               | 25 | 2  | 06/20/2016 |
|               | 26 | 2  | 06/28/2016 |
|               | 27 | 1  | 07/04/2016 |
|               | 28 | 3  | 07/11/2016 |
| <b>Site 4</b> | 29 | 1  | 07/18/2016 |
|               | 30 | 2  | 07/25/2016 |
|               | 31 | 2  | 08/01/2016 |
|               | 32 | 2  | 08/08/2016 |
|               | 33 | 3  | 08/15/2016 |

|               |    |    |            |
|---------------|----|----|------------|
|               | 35 | 3  | 08/28/2016 |
|               | 37 | 1  | 09/12/2016 |
|               | 38 | 1  | 09/19/2016 |
|               | 39 | 3  | 09/26/2016 |
|               | 40 | 2  | 10/02/2016 |
| <b>Total</b>  |    | 31 |            |
| <hr/>         |    |    |            |
|               | 26 | 2  | 06/28/2016 |
|               | 27 | 1  | 07/04/2016 |
|               | 28 | 2  | 07/11/2016 |
|               | 29 | 1  | 07/18/2016 |
| <b>Site 5</b> | 30 | 1  | 07/25/2016 |
|               | 32 | 1  | 08/08/2016 |
|               | 33 | 1  | 08/15/2016 |
|               | 40 | 1  | 10/03/2016 |
|               | 43 | 1  | 11/02/2016 |
| <b>Total</b>  |    | 11 |            |
| <hr/>         |    |    |            |
|               | 26 | 1  | 06/28/2016 |
|               | 27 | 2  | 07/04/2016 |
|               | 28 | 1  | 07/11/2016 |
|               | 29 | 1  | 07/18/2016 |
|               | 30 | 1  | 07/25/2016 |
| <b>Site 6</b> | 31 | 1  | 08/01/2016 |
|               | 32 | 1  | 08/08/2016 |
|               | 33 | 1  | 08/15/2016 |
|               | 34 | 1  | 08/22/2016 |
|               | 35 | 1  | 08/29/2016 |
|               | 37 | 1  | 09/12/2016 |

|                          |                        |                                |                           |
|--------------------------|------------------------|--------------------------------|---------------------------|
|                          | 38                     | 1                              | 09/19/2016                |
|                          | 40                     | 1                              | 10/03/2016                |
| <b>Total</b>             |                        | 14                             |                           |
| <hr/>                    |                        |                                |                           |
| <i>Pool C</i>            |                        |                                |                           |
| <i>Cs. longiareolata</i> |                        |                                |                           |
| <hr/>                    |                        |                                |                           |
|                          | <b>Collection week</b> | <b><i>Specimens Number</i></b> | <b>Date of collection</b> |
| <b>Site 1</b>            | 23                     | 2                              | 06/06/2016                |
|                          | 24                     | 3                              | 06/13/2016                |
|                          | 25                     | 2                              | 06/20/2016                |
|                          | 28                     | 1                              | 07/11/2016                |
|                          | 29                     | 1                              | 07/18/2016                |
|                          | 31                     | 2                              | 08/01/2016                |
|                          | 34                     | 1                              | 08/22/2016                |
|                          | 35                     | 2                              | 08/28/2016                |
|                          | 36                     | 2                              | 09/05/2016                |
|                          | 37                     | 1                              | 09/12/2016                |
|                          | 40                     | 2                              | 10/03/2016                |
|                          | 41                     | 1                              | 10/17/2016                |
| <b>Total</b>             |                        | 20                             |                           |
| <hr/>                    |                        |                                |                           |
| <b>Site 2</b>            | 26                     | 2                              | 06/28/2016                |
|                          | 27                     | 2                              | 07/04/2016                |
|                          | 28                     | 1                              | 07/11/2016                |
|                          | 29                     | 2                              | 07/18/2016                |
|                          | 30                     | 2                              | 07/25/2016                |
|                          | 31                     | 2                              | 08/01/2016                |
|                          | 32                     | 1                              | 08/08/2016                |
|                          | 33                     | 2                              | 08/15/2016                |
|                          | 34                     | 2                              | 08/22/2016                |

|               |    |    |            |
|---------------|----|----|------------|
|               | 35 | 1  | 08/28/2016 |
|               | 36 | 1  | 09/05/2016 |
|               | 38 | 1  | 09/19/2016 |
|               | 40 | 1  | 10/03/2016 |
| <b>Total</b>  |    | 20 |            |
| <b>Site 3</b> | 24 | 2  | 06/13/2016 |
|               | 25 | 3  | 06/20/2016 |
|               | 26 | 2  | 06/28/2016 |
|               | 29 | 1  | 07/18/2016 |
|               | 31 | 1  | 08/01/2016 |
|               | 34 | 1  | 08/22/2016 |
|               | 36 | 1  | 09/05/2016 |
|               | 38 | 1  | 09/19/2016 |
|               | 40 | 1  | 10/02/2016 |
|               | 41 | 2  | 10/17/2016 |
|               | 43 | 1  | 11/02/2016 |
| <b>Total</b>  |    | 16 |            |
| <b>Site 4</b> | 24 | 1  | 06/13/2016 |
|               | 25 | 2  | 06/20/2016 |
|               | 26 | 3  | 06/28/2016 |
|               | 27 | 3  | 07/04/2016 |
|               | 28 | 2  | 07/11/2016 |
|               | 29 | 2  | 07/18/2016 |
|               | 30 | 3  | 07/27/2016 |
|               | 33 | 2  | 08/15/2016 |
|               | 37 | 1  | 09/12/2016 |
|               | 38 | 2  | 09/19/2016 |



|               |    |    |            |
|---------------|----|----|------------|
|               | 39 | 1  | 09/26/2016 |
|               | 40 | 1  | 10/02/2016 |
|               | 43 | 1  | 10/17/2016 |
| <b>Total</b>  |    | 24 |            |
| <hr/>         |    |    |            |
|               | 26 | 2  | 06/28/2016 |
|               | 27 | 1  | 07/04/2016 |
|               | 28 | 1  | 07/11/2016 |
|               | 30 | 1  | 07/25/2016 |
| <b>Site 5</b> | 31 | 1  | 08/01/2016 |
|               | 38 | 2  | 09/19/2016 |
|               | 40 | 1  | 10/03/2016 |
|               | 41 | 2  | 10/10/2016 |
|               | 42 | 1  | 10/17/2016 |
| <b>Total</b>  |    | 12 |            |
| <hr/>         |    |    |            |
|               | 26 | 1  | 06/28/2016 |
|               | 27 | 3  | 07/04/2016 |
| <b>Site 6</b> | 28 | 1  | 07/11/2016 |
|               | 30 | 1  | 07/25/2016 |
|               | 32 | 1  | 08/08/2016 |
|               | 41 | 1  | 10/10/2016 |
| <b>Total</b>  |    | 8  |            |
| <hr/>         |    |    |            |
